# Supplementary material for: Tuneable tetrel bonds between tin and heavy pnictogens
Source: Royal Society of Chemistry journal article supplement (doi:10.1039/d3cc02644b), 2023-01-01
Supplement: d3cc02644b1.pdf [file d3cc02644b1.pdf]

## ELECTRONIC SUPPORTING INFORMATION

### Tuneable Tetrel Bonds between Tin and Heavy Pnictogens

Sachin Liyanage,<sup>a</sup> Jeffrey S. Ovens,<sup>a</sup> Steve Scheiner,<sup>\*b</sup> and David L. Bryce<sup>\*a</sup>

a. Department of Chemistry and Biomolecular Sciences, University of Ottawa, Ottawa, Ontario, K1N6N5, Canada.

b. Department of Chemistry and Biochemistry, Utah State University, Logan, Utah 84322-0300, USA.

\* Authors to whom correspondence may be addressed: [dbryce@uottawa.ca](mailto:dbryce@uottawa.ca);  
[steve.scheiner@usu.edu](mailto:steve.scheiner@usu.edu)

## Table of Contents

|                                          |    |
|------------------------------------------|----|
| 1. Single Crystal X-Ray Diffraction..... | S3 |
| 2. DFT Calculations.....                 | S3 |
| 3. Crystal Packing.....                  | S4 |
| 4. CSD Survey.....                       | S5 |
| 5. References.....                       | S6 |

## 1. Single Crystal X-Ray Diffraction

Crystallographic data for cocrystal **1** were collected from a single crystal mounted on a MiTeGen MicroMount using parabar oil. Data were collected on a Bruker Kappa ApexII single crystal diffractometer equipped with a sealed tube Mo K $\alpha$  source ( $\lambda = 0.71073 \text{ \AA}$ ), a TRIUMPH monochromator, and an ApexII CCD detector. The crystal was held at 200 K using a dry compressed air cooling system. Raw data collection and processing were performed with the Apex3 software package from Bruker.<sup>1</sup> Initial unit cell parameters were determined from 36 data frames from select  $\omega$  scans. Semi-empirical absorption corrections based on equivalent reflections were applied.<sup>2</sup> Systematic absences in the diffraction data-set and unit-cell parameters were consistent with the assigned space group. The initial structural solutions were determined using ShelxT direct methods,<sup>3</sup> and refined with full-matrix least-squares procedures based on  $F^2$  using ShelXL and ShelXle.<sup>4</sup> Hydrogen atoms were placed geometrically and refined using a riding model. The structure was deposited with the Cambridge Structural Database, entry 2266467.

## 2. DFT Calculations

The DFT approach was used to perform quantum chemical calculations within the framework of the Gaussian 16<sup>5</sup> program, applying the M06-2X functional<sup>6</sup> and the polarized triple- $\zeta$  def2-TZVP basis set. Geometries were fully optimized and confirmed as true minima by the lack of any imaginary vibrational frequencies. The interaction energy  $E_{\text{int}}$  of each complex was evaluated as the difference between the energy of the full dimer and the sum of the energies of the individual components, each in the geometry they adopt within the dimer, then corrected for basis set superposition error by the counterpoise procedure.<sup>7</sup> Atoms in

Molecules (AIM) bond paths and their associated critical points were identified with the aid of the AIMAll program,<sup>8</sup> and measures of charge transfer were assessed within the NBO formalism as contained in the Gaussian set of programs.

A set of calculations using coordinates from the X-ray crystal structure of **1** was carried out to assess the potential role of  $\pi$ - $\pi$  interactions. The phenyl rings on the Sn are largely perpendicular to those on P, thus mitigating most  $\pi$ - $\pi$  attractions. There is only one pair of rings that adopt a nearly parallel orientation. An NBO treatment of this complex finds only a combined second-order perturbation energy  $E(2)$  of 0.46 kcal/mol for this pair, far lower than the 11.89 kcal/mol associated with the Sn $\cdots$ P tetrel bond; the density of the critical point along the AIM  $\pi\cdots\pi$  bond path is only 0.0053 au, as compared to 0.0113 for the Sn $\cdots$ P path. It is reasonable to assert then that the  $\pi\cdots\pi$  interaction makes only a minor contribution to the total binding between these two triphenyl moieties.

### 3. Crystal Packing

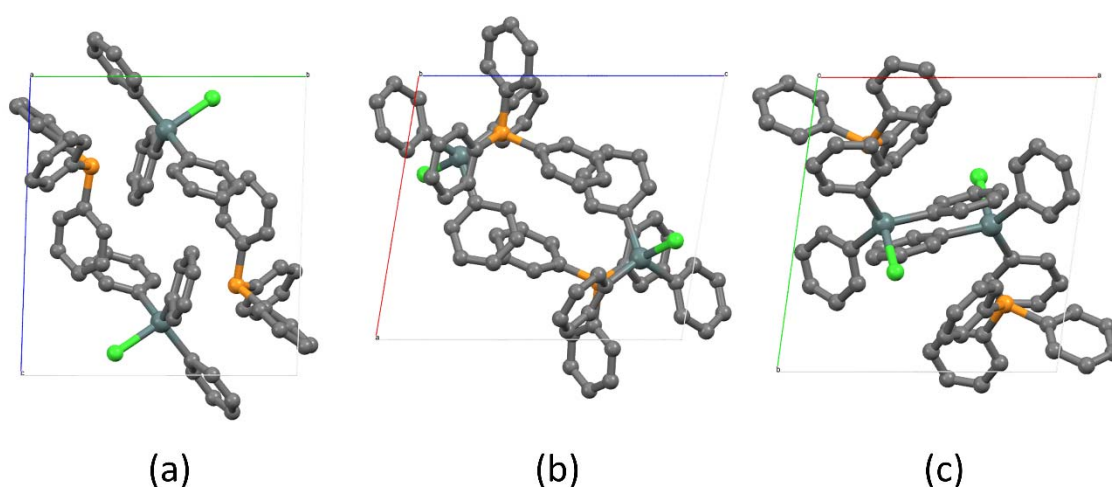

**Figure S1.** View of cocystal **1** along the (a) a, (b) b, and (c) c unit cell axes.

#### 4. CSD Survey

**Table S1.** CSD search results for Sn...P contacts between 2.50 and 4.00 Å.

| CCDC<br>refcode | CIF<br>number | Sn-P<br>distance<br>/ Å | type                                                    |
|-----------------|---------------|-------------------------|---------------------------------------------------------|
| USUFOG          | 2038373       | 2.988                   | organometallic sandwich; possible TB                    |
|                 |               | 2.992                   | molecule; possible intramolecular TB                    |
| PUYVAJ          | 1975272       | 3.001                   | molecule; possible intramolecular TB                    |
| XARHUT          | 127416        | 3.020                   | molecule; possible intramolecular TB; two P with one Sn |
| UMEGUR          | 2025725       | 3.058                   | molecule; possible intramolecular TB                    |
| XAPCEW          | 143976        | 3.064                   | molecule; possible intramolecular TB                    |
| MOVJAI          | 170812        | 3.086                   | molecule; possible intramolecular TB; two P with one Sn |
|                 |               | 3.091                   | molecule; possible intramolecular TB                    |
| NUVGET          | 1995876       | 3.136                   | molecule; possible intramolecular TB                    |
| LEHKIS          | 1204971       | 3.139                   | molecule; possible intramolecular TB                    |
| ZOLBAF          | 992228        | 3.141                   | molecule; possible intramolecular TB                    |
| QIFWAD          | 161249        | 3.188                   | cluster with pendant arms; possible intramolecular TB   |
|                 |               | 3.191                   | molecule; possible intramolecular TB                    |
| YERBUT          | 623248        | 3.228                   | molecule; possible intramolecular TB                    |
| ZOLFUD          | 985249        | 3.247                   | molecule; possible intramolecular TB                    |
| XANMEI          | 2041511       | 3.249                   | molecule; possible intramolecular TB                    |
| ZOKZEG          | 992224        | 3.251                   | molecule; possible intramolecular TB                    |
| YICNOP          | 928769        | 3.285                   | molecule; possible intramolecular TB                    |
| TIZFAM          | 1856313       | 3.308                   | molecule; possible intramolecular TB                    |
| ILEDIM          | 207947        | 3.310                   | molecule; possible intramolecular TB                    |
| TILNOR          | 1270939       | 3.348                   | organometallic sandwich; possible TB                    |
|                 |               | 3.353                   | molecule; possible intramolecular TB; two P with one Sn |
| ZOLQOI          | 985248        | 3.362                   | molecule; possible intramolecular TB                    |
| TOCHUO          | 1272982       | 3.369                   | molecule; possible intramolecular TB                    |
| PEHFOB          | 2152292       | 3.487                   | molecule; possible intramolecular TB                    |
| FOWDAZ          | 1909930       | 3.533                   | molecule; possible intramolecular TB; two P with one Sn |
|                 |               | 3.536                   | molecule; possible intramolecular TB                    |
| RAQHAW          | 2097501       | 3.555                   | molecule; possible intramolecular TB                    |
| USUFAS          | 2038370       | 3.566                   | organometallic sandwich; possible TB                    |
| PUCQIP          | 1022565       | 3.608                   | molecule; possible intramolecular TB                    |
| FOWCUS          | 1909929       | 3.692                   | molecule; possible intramolecular TB                    |
| TIDVAD          | 1270841       | 3.760                   | molecule; possible intramolecular TB                    |
| RAQHEA          | 2097502       | 3.763                   | molecule; possible intramolecular TB                    |
| KOJMII          | 1896344       | 3.785                   | molecule; possible intramolecular TB                    |
|                 |               | 3.843                   | molecule; possible intramolecular TB                    |
|                 |               | 3.867                   | molecule; possible intramolecular TB; two P with one Sn |
| GUXTUP01        | 1057381       | 3.875                   | molecule; possible intramolecular TB                    |
| FOWCOM          | 1909928       | 3.917                   | molecule; possible intramolecular TB                    |
| MOVJEM          | 170813        | 2.605                   | molecule; unlikely to be TB                             |
|                 |               | 4.041                   | molecule; unlikely to be TB                             |
| MOVJUC          | 170816        | 2.930                   | molecule; example with TB geometry but very short       |
| MOVKAJ          | 170817        | 3.415                   | molecule; Sn-O-P over two bonds                         |
| XOWSEI          | 680524        | 3.290                   | molecule; Sn-N-P over two bonds                         |
|                 |               | 3.247                   | molecule; Sn-N-P over two bonds                         |

|        |         |       |                                                   |
|--------|---------|-------|---------------------------------------------------|
| MOVJIQ | 170814  | 2.686 | molecule; example with TB geometry but very short |
| QIWTAT | 947192  | 3.553 | molecule; unlikely to be TB                       |
| ROBKUP | 694941  | 3.748 | molecule; unlikely to be TB                       |
|        |         | 3.767 | molecule; unlikely to be TB                       |
|        |         | 4.089 | molecule; unlikely to be TB                       |
|        |         | 4.126 | molecule; unlikely to be TB                       |
| NUVFUI | 1995874 | 3.476 | molecule; unlikely to be TB                       |
| HAPLUF | 1172232 | 3.912 | molecule; Sn-O-P over two bonds                   |
| MOVKIR | 170819  | 3.438 | molecule; Sn-O-P over two bonds                   |
| QIWSUM | 947191  | 2.727 | molecule; covalent bond?                          |
| BUXWEW | 1117734 | 3.885 | molecule; Sn-O-P over two bonds                   |
|        |         | 3.642 | molecule; Sn-O-P over two bonds                   |
| FACHAT | 1151284 | 3.516 | molecule; Sn-O-P over two bonds                   |
|        |         | 3.386 | molecule; Sn-O-P over two bonds                   |
| FOJVUV | 1158717 | 3.824 | molecule; Sn-O-P over two bonds                   |
|        |         | 3.611 | molecule; Sn-O-P over two bonds                   |
| ACAWAC | 171551  | 3.453 | framework; Sn-O-P over two bonds                  |
|        |         | 3.416 | framework; Sn-O-P over two bonds                  |
|        |         | 3.830 | framework; Sn-O-P over two bonds                  |
|        |         | 3.620 | framework; Sn-O-P over two bonds                  |

---

## 5. References

- <sup>1</sup> APEX Software Suite v 2010 Bruker AXS Inc. Madison Wisconsin USA, 2010.
- <sup>2</sup> R. H. Blessing, *Acta Crystallogr. Sect. A* 1995, **51**, 33.
- <sup>3</sup> G. M. Sheldrick, *Acta Crystallogr. A*, 2008, **64**, 112.
- <sup>4</sup> C. B. Hübschle, G. M. Sheldrick, and B. Dittrich, *J. Appl. Crystallogr.*, 2011, **44**, 1281.
- <sup>5</sup> M. J. Frisch, G. W. Trucks, H. B. Schlegel, G. E. Scuseria, M. A. Robb, J. R. Cheeseman, G. Scalmani, V. Barone, G. A. Petersson, H. Nakatsuji, et al. *Gaussian 16 Rev. C.01*, Wallingford, CT, 2016.
- <sup>6</sup> Y. Zhao and D. G. Truhlar, *Theor. Chem. Acc.*, 2008, **120**, 215.
- <sup>7</sup> S. F. Boy and F. Bernardi, *Mol. Phys.* 1970, **19**, 553.
- <sup>8</sup> T. A. Keith, AIMAll, TK Gristmill Software: Overland Park KS, 2013.
